# Supplementary material for: The Zeeman tuning of the A 6Σ+–X 6Σ+transition of chromium monohydride
Source: Royal Society of Chemistry journal article supplement (doi:10.1039/b614927h), 2007-01-01
Supplement: b614927h.pdf [file b614927h.pdf]

Supplemental Table.1 The observed and calculated Zeeman shifts for the lines of  $X^6\Sigma^+ \leftarrow A^6\Sigma^+$  (0,0) band of CrH

| $M'_F, M'_J$   | $M''_F, M''_J$ | Field (Gauss) | Shift(MHz) <sup>a</sup>            |
|----------------|----------------|---------------|------------------------------------|
| $P_1(1)$       | $\parallel$    |               |                                    |
| -2,-2.5        | -2,-2.5        | 478; 701; 915 | -880(-64); -1165(-10); -1498(-24)  |
| -3,-2.5        | -3,-2.5        |               | -621(18); -966(10); -1291(3)       |
| -1,-1.5        | -1,-1.5        |               | -472(15); -676(2); -868(-16)       |
| -2,-1.5        | -2,-1.5        |               | -335(20); -538(5); -717(-1)        |
| 0,-0.5         | 0,-0.5         |               | -132(30); -192(17); -237(8)        |
| -1,-0.5        | -1,-0.5        |               | -46(27); -106(11); -151(1)         |
| 0,0.5          | 0,0.5          |               | 233(28); 328(28); 430(30)          |
| 1,0.5          | 1,0.5          |               | 147(-12); 242(-10); 344(-6)        |
| 1,1.5          | 1,1.5          |               | 475(-5); 705(-5); 944(6)           |
| 2,1.5          | 2,1.5          |               | 472(-4); 695(-11); 933(1)          |
| 2,2.5          | 2,2.5          |               | 752(1); 1110(-4); 1458(-8)         |
| 3,2.5          | 3,2.5          |               | 748(1); 1090(-19); 1463(3)         |
| $P_1(1)$       | $\perp$        |               |                                    |
| -2,-2.5        | -1,-1.5        | 475;701;914   | -1776(-38); -2583(-59); -3329(-73) |
| -3,-2.5        | -2,-1.5        |               | -1619(-29); -2390(-16); -3168(-62) |
| -1,-1.5        | 0,-0.5         |               | -1433(-18); -2076(-21); -2719(-70) |
| -2,-1.5        | -1,-0.5        |               | -1347(-36); -1990(-41); -2633(-91) |
| -1,-0.5        | 0,0.5          |               | -1054(-19); -1568(-36); —          |
| 0,-0.5         | 1,0.5          |               | -1140(-45); -1654(-60); —          |
| 0,0.5          | 1,1.5          |               | -740(23); -1126(-5); -1464(-10)    |
| 1,0.5          | 2,1.5          |               | -826(-46); -1212(-72); -1549(-76)  |
| 1,1.5          | 2,2.5          |               | -525(-32); -754(-36); -981(-54)    |
| 2,1.5          | 3,2.5          |               | -500(-32); -741(-47); -971(-67)    |
| 2,2.5          | 3,3.5          |               | -254(-29); -356(-34); -450(-37)    |
| 3,2.5          | 4,3.5          |               | -216(-13); -346(-47); -415(-25)    |
| -2,-2.5        | -3,-3.5        |               | 118(8); 203(-2); 323(27)           |
| -3,-2.5        | -4,-3.5        |               | 207(4); 301(2); 427(37)            |
| -1,-1.5        | -2,-2.5        |               | 453(12); —; 946(14)                |
| -2,-1.5        | -3,-2.5        |               | 614(9); —; 1146(49)                |
| 0,-0.5         | -1,-1.5        |               | 824(55); 1206(37); 1624(71)        |
| -1,-0.5        | -2,-1.5        |               | 909(22); 1291(2); 1710(35)         |
| 1,0.5          | 0,-0.5         |               | 1128(36); 1657(20); 2227(67)       |
| 0,0.5          | -1,-0.5        |               | 1214(27); 1743(6); 2313(61)        |
| 1,1.5          | 0,0.5          |               | 1496(53); 2198(67); 2853(63)       |
| 2,1.5          | 1,0.5          |               | 1410(-1); 2113(14); 2817(62)       |
| 2,2.5          | 1,1.5          |               | 1746(31); 2575(32); 3416(88)       |
| 3,2.5          | 2,1.5          |               | 1727(43); 2537(29); 3375(82)       |
| $^R P_{31}(0)$ | $\parallel$    |               |                                    |
| -1,-1.5        | -1,-1.5        | 479; 701; 915 | -735.6(29); -1039(36); -1336(1)    |
| -2,-1.5        | -2,-1.5        |               | -581(-2); -890(-1); -1196(-8)      |
| 0,-0.5         | 0,-0.5         |               | -261(-4); -374(-12); -473(-9)      |
| -1,-0.5        | -1,-0.5        |               | -198(-34); -312(-43); -411(-40)    |
| 0,0.5          | 0,0.5          |               | 230(-22); 333(-21); 433(-18)       |
| 1,0.5          | 1,0.5          |               | 167(-48); 270(-45); 370(-41)       |
| 1,1.5          | 1,1.5          |               | 636(-34); 948(-29); 1238(-35)      |
| 2,1.5          | 2,1.5          |               | 614(-34); 923(-31); 1235(-15)      |
| $^R P_{31}(0)$ | $\perp$        |               |                                    |
| -1,-1.5        | 0,-0.5         | 475; 701; 914 | -2022(9); -2971(8); -3931(-59)     |
| -2,-1.5        | -1,-0.5        |               | -1959(-39); -2908(-42); -3814(-55) |
| -1,-0.5        | 0,0.5          |               | -1536(-28); -2275(-29); -3001(-59) |
| 0,-0.5         | 1,0.5          |               | -1598(-34); -2337(-34); -3064(-63) |
| 0,0.5          | 1,1.5          |               | -1130(-36); -1675(-52); -2193(-70) |
| 1,0.5          | 2,1.5          |               | -1071(27); -1599(29); -2143(-16)   |
| 1,1.5          | 2,2.5          |               | -715(-35); -1044(-45); -1379(-79)  |
| 2,1.5          | 3,2.5          |               | -714(-45); -1028(-40); -1369(-80)  |
| -1,-1.5        | -2,-2.5        |               | 603(16); 928(24); 1231(31)         |
| -2,-1.5        | -3,-2.5        |               | 663(-3); 1008(26); 1313(34)        |
| 0,-0.5         | -1,-1.5        |               | 1079(24); 1598(19); 2089(16)       |

Supplemental Table.1 (Cont.)

| $M'_F, M'_J$   | $M''_F, M''_J$ | Field (Gauss)      | Shift(MHz) <sup>a</sup>                       |
|----------------|----------------|--------------------|-----------------------------------------------|
| $^R P_{31}(0)$ | $\perp$        |                    |                                               |
| -1,-0.5        | -2,-1.5        | 475; 701; 914      | 1141(-42); 1710(4); 2233(30)                  |
| 1,0.5          | 0,-0.5         |                    | 1517(-6); 2261(-8); 3000(53)                  |
| 0,0.5          | -1,-0.5        |                    | 1579(-17); 2323(-14); 3063(40)                |
| 1,1.5          | 0,0.5          |                    | 2014(5); 2940(-11); 3919(75)                  |
| 2,1.5          | 1,0.5          |                    | 1909(-43); 2886(1); 3814(29)                  |
| $^R Q_{21}(0)$ | $\parallel$    |                    |                                               |
| 2,2.5          | 2,2.5          | 478; 705; 928      | -523(80); -747(36); -964(36)                  |
| 1,1.5          | 1,1.5          |                    | -289(-1); -418(0); -548(-4)                   |
| 2,1.5          | 2,1.5          |                    | -250(7); -363(8); -486(-1)                    |
| 1,0.5          | 1,0.5          |                    | -43(-9); -61(8); -119(7)                      |
| 0,0.5          | 0,0.5          |                    | -83(33); -101(52); -159(26)                   |
| 0,-0.5         | 0,-0.5         |                    | 127(-10); 182(8); 229(-18)                    |
| -1,0.5         | -1,0.5         |                    | 167(40); 222(40); 269(32)                     |
| -1,-1.5        | -1,-1.5        |                    | 274(17); 412(17); 547(8)                      |
| -2,-1.5        | -2,-1.5        |                    | 419(24); 532(18); 673(14)                     |
| -2,-2.5        | -2,-2.5        |                    | 454(47); 660(15); 900(17)                     |
| -3,-2.5        | -3,-2.5        |                    | 521(45); 753(19); 963(37)                     |
| $^R Q_{21}(0)$ | $\perp$        |                    |                                               |
| 1,1.5          | 2,2.5          | 475; 699; 913      | -1677 24-2422 68-3185 70                      |
| 2,1.5          | 3,2.5          |                    | -1594(-38); -2334(-28); -3098(-73)            |
| 0,0.5          | 1,1.5          |                    | -1437(-44); -2117(-29); -2785(-75)            |
| 1,0.5          | 2,1.5          |                    | -1417(-21); -2079(-38); -2723(-76)            |
| -1,-0.5        | 0,0.5          |                    | -1213(-31); -1796(-30); -2375(-45)            |
| 0,-0.5         | 1,0.5          |                    | -1253(-17); -1836(-28); -2415(-64)            |
| -1,-1.5        | 0,-0.5         |                    | -1087(-30); -1568(-40); -2074(-76)            |
| -2,-1.5        | -1,-0.5        |                    | -986(-25); -1472(-22); -1981(-69)             |
| -2,-2.5        | -1,-1.5        |                    | -903(-9); -1322(-13); -1717(-62)              |
| -3,-2.5        | -2,-1.5        |                    | -750(0); -1162(-22); -1576(-39)               |
| 2,2.5          | 1,1.5          |                    | 860(8); 1277(-7); 1677(-45)                   |
| 1,1.5          | 0,0.5          |                    | 1086(34); 1595(48); 2086(78)                  |
| 2,1.5          | 1,0.5          |                    | 1102(36); 1597(47); 2103(60)                  |
| 1,0.5          | 0,-0.5         |                    | 1286(31); 1869(29); 2480(58)                  |
| 0,0.5          | -1,-0.5        |                    | 1326(52); 1909(45); 2520(90)                  |
| 0,-0.5         | -1,-1.5        |                    | 1438(52); 2139(45); 2803(90)                  |
| -1,-0.5        | -2,-1.5        |                    | 1516(51); 2241(63); 2899(74)                  |
| -1,-1.5        | -2,-2.5        |                    | 1597(20); 2390(65); 3158(71)                  |
| -2,-1.5        | -3,-2.5        |                    | 1678(41); 2448(65); 3195(96)                  |
| $R_1(0)$       | $\parallel$    |                    |                                               |
| 2,2.5          | 2,2.5          | 479; 706; 915      | -1132(-33); -1648(-31); -2143(-48)            |
| 3,2.5          | 3,2.5          |                    | -1104(-46); -1630(-54); -2122(-68)            |
| 1,1.5          | 1,1.5          |                    | -684(-39); -976(-17); -1298(-48)              |
| 2,1.5          | 2,1.5          |                    | -680(-33); -1007(-46); -1316(-63)             |
| 0,0.5          | 0,0.5          |                    | -209(-19); -306(-8); -430(-28)                |
| 1,0.5          | 1,0.5          |                    | -292(-57); -389(-44); -513(-64)               |
| 0,-0.5         | 0,-0.5         |                    | 140(-38); 268(-5); 341(-18)                   |
| -1,-0.5        | -1,-0.5        |                    | 223(-45); 351(-13); 423(-27)                  |
| -1,-1.5        | -1,-1.5        |                    | 556(-34); 878(-15); 1152(-18)                 |
| -2,-1.5        | -2,-1.5        |                    | 714(-12); 1009(-20); 1305(-1)                 |
| -2,-2.5        | -2,-2.5        |                    | 972(-33); 1484(-31); 1961(-24)                |
| -3,-2.5        | -3,-2.5        |                    | 1070(-8); 1570(-20); 2034(-26)                |
| $R_1(0)$       | $\perp$        |                    |                                               |
| 1,1.5          | 2,2.5          | 476; 582; 803; 961 | -1918(70); -2407(24); -3452(-96); -4147(-130) |
| 2,1.5          | 3,2.5          |                    | -1905(51); -2389(10); -3422(-99); -4126(-140) |
| 0,0.5          | 1,1.5          |                    | -1486(50); -1856(27); -2681(-73); -3200(-72)  |
| 1,0.5          | 2,1.5          |                    | -1517(30); -1876(18); -2699(-80); -3213(-73)  |
| -1,-0.5        | 0,0.5          |                    | -1036(46); -1297(36); -1895(-80); -2280(-45)  |
| 0,-0.5         | 1,0.5          |                    | -1119(18); -1380(8); -1978(-88); -2363(-72)   |

Supplemental Table.1 (Cont.)

| $R_i(0)$ | $\perp$ |  |                                         |
|----------|---------|--|-----------------------------------------|
| -1,-1.5  | 0,-0.5  |  | -716(10);-858(22);-1215(-10);-1457(-20) |
| -2,-1.5  | -1,-0.5 |  | -633(-6);-775(6);-1132(-28);-1374(-37)  |
| -2,-2.5  | -1,-1.5 |  | -303(11);-392(-20);-525(-32);-609(-29)  |
| -3,-2.5  | -2,-1.5 |  | -148(23);-216(12);-346(2);-449(-14)     |
| -3,-3.5  | -2,-2.5 |  | 71(-26);119(-18);220(-1);255(-26)       |
| -4,-3.5  | -3,-2.5 |  | 144(-36);205(-16);316(12);334(-31)      |
| 3,3.5    | 2,2.5   |  | -148(47);-216(20);-299(20);-367(12)     |
| 4,3.5    | 3,2.5   |  | -151(30);-198(23);-284(21);-355(10)     |
| 2,2.5    | 1,1.5   |  | 262(6);322(12);434(10);507(4)           |
| 3,2.5    | 2,1.5   |  | 235(-28);289(-28);444(15);495(-14)      |
| 1,1.5    | 0,0.5   |  | 721(13);888(31);1217(6);1445(56)        |
| 2,1.5    | 1,0.5   |  | 638(-33);805(-15);1135(-20);1362(11)    |
| 1,0.5    | 0,-0.5  |  | 1056(-23);1308(-16);1872(38);2261(65)   |
| 0,0.5    | -1,-0.5 |  | 1139(-21);1391(-15);1955(39);2344(65)   |
| 0-0.5    | -1,-1.5 |  | 1457(-32);1833(3);2576(36);3102(57)     |
| -1,-0.5  | -2,-1.5 |  | 1575(-40);1916(-41);2707(40);3242(69)   |
| -1,-1.5  | -2,-2.5 |  | 1846(-52);2336(0);3300(53) 3967(69)     |
| -2,-1.5  | -3,-2.5 |  | 1908(-56);2380(-22);3356(42);4048(83)   |

<sup>a</sup> The numbers in parentheses is the observed minus calculated shifts.

<sup>b</sup> “ $\parallel$ ” = parallel polarization ; “ $\perp$ ” = perpendicular polarization.

Supplemental Table.2 The observed and calculated Zeeman shifts for the lines of  $X^6\Sigma^+ \leftarrow A^6\Sigma^+ (1,0)$  band of CrH

| $M'_F, M''_F$ | $M'_F, M''_F$ | Field (Gauss)           | Shift(MHz) <sup>a</sup>                                            |
|---------------|---------------|-------------------------|--------------------------------------------------------------------|
| $R_1(0)$      | $\parallel^b$ |                         |                                                                    |
| 2,2.5         | 2,2.5         | 411;527;649;762;874;983 | -936(5); -1219(-17); -1469(9); -1714(19); -1977(11); -2215(19)     |
| 3,2.5         | 3,2.5         |                         | -886(3); -1163(-13); -1414(12); -1654(28); -1907(28); -2155(28)    |
| 1,1.5         | 1,-1.5        |                         | -535(15); -704(4); -859(16); -1019(11); -1175(10); -1290(46)       |
| 2,1.5         | 2,-1.5        |                         | -538(4); -690(11); -871(-3); -1016(8); -1147(32); -1285(45)        |
| 0,0.5         | 0,0.5         |                         | -153(5); -193(21); -233(38); -287(38); -351(29); -377(56)          |
| 1,0.5         | 1,0.5         |                         | -225(-29); -265(-13); -304(5); -359(6); -423(-3); -449(25)         |
| 0,-0.5        | 0,-0.5        |                         | 173(23); 226(27); 254(4); 340(43); 358(16); 419(33)                |
| -1,-0.5       | -1,-0.5       |                         | 245(11); 298(14); 326(-9); 412(29); 430(1); 491(18)                |
| -1,-1.5       | -1,-1.5       |                         | 501(4); 666(15); 804(-8); 991(30); 1120(12); 1266(15)              |
| -2,-1.5       | -2,-1.5       |                         | 655(28); 839(57); 950(6); 1138(45); 1279(38); 1421(37)             |
| -2,-2.5       | -2,-2.5       |                         | 865(21); 1137(33); 1396(21); 1658(31); 1874(-2); 2125(7)           |
| -3,-2.5       | -3,-2.5       |                         | 930(13); 1216(41); 1477(29); 1716(17); 1964(15); 2220 (29)         |
| $R_1(0)$      | $\perp$       |                         |                                                                    |
| 1, 1.5        | 2, 2.5        | 315;431;535;646;762;868 | -1234(83);-1756(43); -2221(11); -2716(-22);-3196(-19);-3625(-5)    |
| 2, 1.5        | 3, 2.5        |                         | -1206(69);-1697(60);-2170(21); -2678(-25);-3143(-6);-3592(-13)     |
| 0, 0.5        | 1, 1.5        |                         | -934(77); -1344(46); -1705(24); -2140(-48);-2479(-7);-2826(-6)     |
| 1, 0.5        | 2, 1.5        |                         | -932(82); -1354(39); -1721(12); -2096(1); -2481(-4); -2838(-13)    |
| -1, -0.5      | 0, 0.5        |                         | -664(42); -921(59); -1195(31); -1407(82); -1762(3); -2009(9)       |
| 0, -0.5       | 1, 0.5        |                         | -735(19); -992(37); -1266(9); -1477(62); -1833(-18); -2080(-12)    |
| -1, -1.5      | 0, -0.5       |                         | -454(39); -618(45); -778(38); -953(27); -1109(42); -1277(31)       |
| -2, -1.5      | -1, -0.5      |                         | -384(16); -548(21); -707(13); -882(2); -1038(17); -1206 (5)        |
| -2, -2.5      | -1, -1.5      |                         | -224(8); -290(7); -358 (-2); -428(-9); -506(-21); -552(-7)         |
| -3, -2.5      | -2, -1.5      |                         | -92(0); -145(11); -201(13); -249(27); -330(12); -406(-4)           |
| -3, -3.5      | -2, -2.5      |                         | 13(-15); 61(-8); 107(2); 114(-30); 182(-2); 211(-10)               |
| -4, -3.5      | -3, -2.5      |                         | 67(-43); 129(-22); 200(12); 233(7); 272(5); 330(26)                |
| 3, 3.5        | 2, 2.5        |                         | -92(39); -145(26); -201(7); -249(-2); -302(-15); -305(19)          |
| 4, 3.5        | 3, 2.5        |                         | -91(19); -149(2); -163(24); -212(15); -264(3); -296(8)             |
| 2, 2.5        | 1, 1.5        |                         | 180(7); 242(6); 312(20); 345(-6); 438(25); 497(27)                 |
| 3, 2.5        | 2, 1.5        |                         | 163(-29); 266(12); 332(22); 389(20); 461(30); 515(28)              |
| 1, 1.5        | 0, 0.5        |                         | 477(-1); 648(3); 817(23); 996(44); 1149(33); 1316(49)              |
| 2, 1.5        | 1, 0.5        |                         | 407(-46); 577(-41); 746(-20); 925(2); 1079(-9); 1245(8)            |
| 1, 0.5        | 0, -0.5       |                         | 671(-41); 950(-31); 1225(3); 1514(34); 1776(29); 2037(46)          |
| 0, 0.5        | -1, -0.5      |                         | 741(-43); 1021(-34); 1296(-1) 1584(30); 1847(24); 2108(41)         |
| 0, -0.5       | -1, -1.5      |                         | 907(-65); 1310(-36); 1684(4); 2091(54); 2414(5); 2815(67)          |
| -1, -0.5      | -2, -1.5      |                         | 1026(-65);1437(-29);1801(0); 2217(59); 2550(19); 2933(63)          |
| -1, -1.5      | -2, -2.5      |                         | 1177(-54);1660(-49); 2134(-4); 2640(44); 3113(41); 3572(64)        |
| -2, -1.5      | -3, -2.5      |                         | 1240(-53); 1734(-37); 2193(-7); 2706(49); 3173(38); 3638(68)       |
| $^RQ_{21}(0)$ | $\parallel$   |                         |                                                                    |
| 1, 1.5        | 1, 1.5        | 423;540;651;763;874;983 | -444(8); -562(9); -681(4); -791.5(6); -925(-17); -1012(6)          |
| 2, 1.5        | 2, 1.5        |                         | -394(-5); -504(4); -627(-6); -724.9(10); -864(-18); -972(-17)      |
| 1, 0.5        | 1, 0.5        |                         | -137(-11);-150(13); -195(3); -209.6(23); -274(-8); -298(0)         |
| 0, 0.5        | 0, 0.5        |                         | -171(-44);-185(-20);-230(-30); -244.4(-10); -309(-41); -333(-33)   |
| 0, -0.5       | 0, -0.5       |                         | 132(-5); —; 238(16); 268.2(3); 315(6); 358(6)                      |
| -1, -0.5      | -1, -0.5      |                         | 167(-29); —; 273(-9); 303(-22); 350(-18); 393(-19)                 |
| -1, -1.5      | -1, -1.5      |                         | 383(-16); 509(-14); 651(10); 759.2(-1); 888(8); 1000(3)            |
| -2, -1.5      | -2, -1.5      |                         | 501(-18); 643(0); 768(7); 863.8(-17); 1022(22); 1135(17)           |
| -2, -2.5      | -2, -2.5      |                         | 643(-16); 862(-1); 1056(0); 1262.8(11); 1460(14); 1616(-21)        |
| -3, -2.5      | -3, -2.5      |                         | 712(-22); 929(-10);1131(-15); 1338.1(11); 1540(18); 1718(6)        |
| $^RQ_{21}(0)$ | $\perp$       |                         |                                                                    |
| 1, 1.5        | 2, 2.5        | 424;545;651;765;876;982 | -1705(-49);-2153(-36);-2568(-47);-2996(-41);-3431(-55);-3818(-39)  |
| 2, 1.5        | 3, 2.5        |                         | —; —; —; —; —; -3725(-43)                                          |
| 0, 0.5        | 1, 1.5        |                         | -1306(25);-1754(-47);-2086(-49);-2361(30);-2776(-42);-3138(-75)    |
| 1, 0.5        | 2, 1.5        |                         | -1316(-22); -1715(-44); -2063(-63); —; -2743(-45); -3098(-73)      |
| -1, -0.5      | 0, 0.5        |                         | -1050(-43);-1340(-40);-1599(-44);-1878(-48);-2142(-45); -2410(-59) |
| 0, -0.5       | 1, 0.5        |                         | -1085(-55); -1374(-51);-1634(-55);-1913(-59);-2177(-56);-2445(-70) |
| -1, -1.5      | 0, -0.5       |                         | -803(-36);-1015(-38);-1223(-62);-1394(-37);-1558(-9);-1784(-53)    |
| -2, -1.5      | -1, -0.5      |                         | -721(-37);-921(-28);-1113(-37); -1314(-41); -1467(-3); -1682(-36)  |

Supplemental Table 2 (Cont.)

| $M'_F, M'_J$    | $M''_F, M''_J$ | Field (Gauss)           | Shift(MHz) <sup>a</sup>                                         |
|-----------------|----------------|-------------------------|-----------------------------------------------------------------|
| ${}^RQ_{21}(0)$ | $\perp$        |                         |                                                                 |
| -2, -2.5        | -1, -1.5       | 424;545;651;765;876;982 | -548(-43);-665(-32);-773(-28); -893(-29); —; -1048(43)          |
| -3, -2.5        | -2, -1.5       |                         | -397(-36);-519(-31);-638(-38); -753(-34);-849(-14);-963(-18)    |
| 2, 2.5          | 1, 1.5         |                         | 364(-58); 516(-37); 690(24); 761(-28); 896(-13);1002(-22)       |
| 1, 1.5          | 0, 0.5         |                         | 723(-26); 906(-59); 1121(-32); 1331(-25); 1536(-19);1713(-32)   |
| 2, 1.5          | 1, 0.5         |                         | 738(-40); 946(-46); 1162(-19); 1356(-28); 1554(-29);1754(-19)   |
| 1, 0.5          | 0, -0.5        |                         | 1006(-36);1307(-34); 1590(-14); 1853(-34); 2123(-41); 2412(-17) |
| 0, 0.5          | -1, -0.5       |                         | 1040(-35); 1342(-32);1624(-13); 1888(-33); 2158(-40); 2447(-16) |
| 0, -0.5         | -1, -1.5       |                         | 1263(-33);1674(-5); 1996(-28); 2369(-17); 2722(-18); 3063(-15)  |
| -1, -0.5        | -2, -1.5       |                         | 1356(-44);1770(-13);2100(-20); 2479(-3); 2818(-17); 3174(1)     |
| -1, -1.5        | -2, -2.5       |                         | 1531(-36);2006(-27);2416(-26); 2862(-21);3293(-19);3712(-11)    |
| -2, -1.5        | -3, -2.5       |                         | 1587(-31);2056(-28); 2473(-20); 2919(-14); 3331(-31);3763(-10)  |
| ${}^RP_{31}(0)$ | $\parallel$    |                         |                                                                 |
| -1, -1.5        | -1, -1.5       | 412;526;651;763;874;983 | -591(47); -740(48); -886(65); -1032(65); -1178(20); -1327(14)   |
| -2, -1.5        | -2, -1.5       |                         | -453(-4); -595(2); -731(29); -873(33); -1028(24); -1173(21)     |
| 0, -0.5         | 0, -0.5        |                         | -191(18); -233(27); -272(43); -335(31); -380(35); -436(29)      |
| -1, -0.5        | -1, -0.5       |                         | -127(-5); -169(3); -209(18); -271(5); -316(10); -372(3)         |
| 0, 0.5          | 0, 0.5         |                         | 223(17); 274(20); 346(38); 395(39); 441(39); 482(34)            |
| 1, 0.5          | 1, 0.5         |                         | 160(-17); 211(-14); 283(5); 331(7); 377(7); 418(2)              |
| 1, 1.5          | 1, 1.5         |                         | 551(17); 692(10); 869(25); 1022(33); 1165(33); 1305(32)         |
| 2, 1.5          | 2, 1.5         |                         | 532(14); 684(19); 847(21); 1007(37); 1139(26); 1289(36)         |
| ${}^RP_{31}(0)$ | $\perp$        |                         |                                                                 |
| -1, -1.5        | 0, -0.5        | 424; 540                | -1800(-23); -2271(-18)                                          |
| -2, -1.5        | -1, -0.5       |                         | -1689(-21); -2148(-5)                                           |
| -1, -0.5        | 0, 0.5         |                         | -1339(-8);-1708(-3)                                             |
| 0, -0.5         | 1, 0.5         |                         | -1402(-20); -1771(-14)                                          |
| 0, 0.5          | 1, 1.5         |                         | -1000(-9);-1274(-8)                                             |
| 1, 0.5          | 2, 1.5         |                         | -989(-2); -1257(4)                                              |
| 1, 1.5          | 2, 2.5         |                         | -647(5);-840(-14)                                               |
| 2, 1.5          | 3, 2.5         |                         | -627(8);-808(1)                                                 |
| -1, -1.5        | -2, -2.5       |                         | 583(26);738(8)                                                  |
| -2, -1.5        | -3, -2.5       |                         | 661(27);819(12)                                                 |
| 0, -0.5         | -1, -1.5       |                         | 979(26);1252(27)                                                |
| -1, -0.5        | -2, -1.5       |                         | 1115(39);1375(26)                                               |
| 1, 0.5          | 0, -0.5        |                         | 1375(26);1751(29)                                               |
| 0, 0.5          | -1, -0.5       |                         | 1438(24);1815(27)                                               |
| 1, 1.5          | 0, 0.5         |                         | 1779(27);2241(13)                                               |
| 2, 1.5          | 1, 0.5         |                         | 1715(14);2187(13)                                               |
| $P_1(1)$        | $\parallel$    |                         |                                                                 |
| -2, -2.5        | -2, -2.5       | 655; 763; 874; 993      | -702(11); -841(-26); -932(-15); -1048(-22)                      |
| -3, -2.5        | -3, -2.5       |                         | -536(-1); -649(-13); -776(-38); -888(-42)                       |
| -1, -1.5        | -1, -1.5       |                         | -402(12); -481(-13); -535(-15); -585(-11)                       |
| -2, -1.5        | -2, -1.5       |                         | -282(1); -351(-15); -396(-9); -455(-14)                         |
| 0, -0.5         | 0, -0.5        |                         | -95(27); -129(2); -127(9); -125(14)                             |
| -1, -0.5        | -1, -0.5       |                         | -41(-4); -74(-30); -73(-24); -71(-19)                           |
| 0, 0.5          | 0, 0.5         |                         | 211(9); 205(-33); 273(-4); 319(-3)                              |
| 1, 0.5          | 1, 0.5         |                         | 156(-6); 151(-47); 219(-18); 264(-16)                           |
| 1, 1.5          | 1, 1.5         |                         | 439(4); 496(-16); 583(-10); 660(-21)                            |
| 2, 1.5          | 2, 1.5         |                         | 438(-3); 506(-11); 588(-9); 689(4)                              |
| 2, 2.5          | 2, 2.5         |                         | 626(-35); 728(-49); 853(-44); 961(-65)                          |
| 3, 2.5          | 3, 2.5         |                         | 628(-34); 738(-40); 861(-35); 983(-43)                          |
| $P_1(1)$        | $\perp$        |                         |                                                                 |
| -2, -2.5        | -1, -1.5       | 541; 651; 764; 874; 983 | —; —; -2378(-72); -2704(-81); -3023(-89)                        |
| -3, -2.5        | -2, -1.5       |                         | —; —; -2218(-60); -2546(-72); -2873(-89)                        |
| -1, -1.5        | 0, -0.5        |                         | -1400(16); —; -1999(-30); -2274(-36); -2537(-34)                |
| -2, -1.5        | -1, -0.5       |                         | -1346(-30); —; -1903(-36); -2220(-85); -2482(-83)               |
| -1, -0.5        | 0, 0.5         |                         | -1123(-1); -1357(-6); -1616(-32); -1844(-35); -2082(-52)        |
| 0, -0.5         | 1, 0.5         |                         | -1178(0); -1411(-4); -1671(-30); -1898(-32); -2136(-49)         |
| 0, 0.5          | 1, 1.5         |                         | -950(-18); -1136(-16); -1330(-20); -1512(-18); -1729(-54)       |

Supplemental Table 2 (Cont.)

| $M'_F, M'_J$  | $M''_F, M''_J$ | Field (Gauss)                | Shift(MHz) <sup>a</sup>                                                |
|---------------|----------------|------------------------------|------------------------------------------------------------------------|
| $P_1(1)$      | $\perp$        |                              |                                                                        |
| 1, 0.5        | 2, 1.5         |                              | -942(1); -1125(6); -1324(-2); -1566(-60); -1738(-52)                   |
| 1, 1.5        | 2, 2.5         |                              | -769(-22); -908(-14); -1074(-30); -1246(-56); -1407(-74)               |
| 2, 1.5        | 3, 2.5         |                              | -705(8); -860(0); -1024(-12); -1192(-35); -1332(-32)                   |
| 2, 2.5        | 3, 3.5         |                              | -583(-17); -706(-31); -831(-44); -972(-75); -1092(-87)                 |
| 3, 2.5        | 4, 3.5         |                              | -553(-15); -669(-22); -798(-39); -929(-61); -1046(-69)                 |
| -2, -2.5      | -3, -3.5       | 541; 651; 764; 874; 983      | 404(-41); 515(-39); 629(-37); 752(-23); 822(-61)                       |
| -3, -2.5      | -4, -3.5       |                              | 507(-30); 603(-43); 725(-34); 850(-18); 919(-57)                       |
| -1, -1.5      | -2, -2.5       |                              | 678(-21); 830(-29); 1001(-23); 1186(0); 1316(-31)                      |
| -2, -1.5      | -3, -2.5       |                              | 824(-37); 978(-42); 1150(-36); 1337(-11); 1473(-38)                    |
| 0, -0.5       | -1, -1.5       |                              | 940(-9); 1138(-18); 1357(-15); 1630(47); 1772(-22)                     |
| -1, -0.5      | -2, -1.5       |                              | 1033(-30); 1227(-44); 1461(-25); 1685(-14); 1901(-9)                   |
| 1, 0.5        | 0, -0.5        |                              | 1179(-14); 1426(-21); 1689(-21); 1954(-13); 2194(-31)                  |
| 0, 0.5        | -1, -0.5       |                              | 1234(-49); 1480(-58); 1743(-57); 2009(-45); 2248(-56)                  |
| 1, 1.5        | 0, 0.5         |                              | 1439(-16); 1715(-38); 2029(-32); 2329(-34); 2625(-40)                  |
| 2, 1.5        | 1, 0.5         |                              | 1384(-48); 1698(-32); 2014(-24); 2275(-65); 2571(-70)                  |
| 2, 2.5        | 1, 1.5         |                              | 1603(-41); 1929(-55); 2287(-49); 2648(-31); 2967(-54)                  |
| 3, 2.5        | 2, 1.5         |                              | 1566(-52); 1916(-40); 2266(-42); 2617(-33); 2981(-11)                  |
| $^pR_{31}(1)$ | $\parallel$    |                              |                                                                        |
| 1, 1.5        | 1, 1.5         | 428; 540; 655; 763; 874; 983 | -977(-7); -1231(-11); -1468(6); -1713(-1); -1961(-6); -2208(-15)       |
| 2, 1.5        | 2, 1.5         |                              | -924(0); -1177(-3); -1429(-1); -1672(-5); -1906(4); -2147(1)           |
| 0, 0.5        | 0, 0.5         |                              | -278(2); -325(32); -415(18); -448(56); -563(11); -629(13)              |
| 1, 0.5        | 1, 0.5         |                              | -340(-34); -387(-3); -477(-16); -510(22); -625(-22); -691(-20)         |
| 0, -0.5       | 0, -0.5        |                              | 315(8); 447(48); 509(13); 595(6); 628(-57); 782(0)                     |
| -1, -0.5      | -1, -0.5       |                              | 377(-29); 509(9); 571(-25); 657(-33); 740(-48); 844(-40)               |
| -1, -1.5      | -1, -1.5       |                              | 909(-6); 1214(40); 1438(-4); 1702(7); 1943(-13); 2204(-8)              |
| -2, -1.5      | -2, -1.5       |                              | 967(-8); 1261(25); 1490(-13); 1739(-17); 2022(5); 2249(-25)            |
| $^pR_{31}(1)$ | $\perp$        |                              |                                                                        |
| 0, 0.5        | 1, 1.5         | 424; 541; 651; 765; 876; 983 | -2020(-51); -2564(-54); -3057(-40); -3580(-39); -4086(-36); -4586(-46) |
| 1, 0.5        | 2, 1.5         |                              | -1962(-22); -2532(-51); -3044(-56); -3576(-63); -4044(-22); -4556(-43) |
| -1, -0.5      | 0, 0.5         |                              | -1330(-45); -1681(-36); -2009(-27); -2364(-34); -2701(-34); -3023(-34) |
| 0, -0.5       | 1, 0.5         |                              | -1392(-65); -1743(-54); -2071(-45); -2426(-51); -2763(-51); -3085(-50) |
| -1, -1.5      | 0, -0.5        |                              | -701(19); -952(-47); -1134(-58); -1268(-17); -1438(-18); -1641(-59)    |
| -2, -1.5      | -1, -0.5       |                              | -639(-34); -848(-59); -1011(-52); -1206(-73); -1376(-74); -1532(-69)   |
| -2, -2.5      | -1, -1.5       |                              | -170(-52); -188(-60); -200(-65); -222(-80); -223(-76); -223(-72)       |
| -3, -2.5      | -2, -1.5       |                              | -103(-61); -97(-46); -113(-55); -151(-87); -142(-73); -143(-70)        |
| 2, 2.5        | 1, 1.5         |                              | 14(-32); 21(-46); 45(-42); 29(-79); 63(-69); 74(-81)                   |
| 3, 2.5        | 2, 1.5         |                              | 15(-44); 38(-42); 50(-49); 70(-51); 83(-60); 124(-43)                  |
| 1, 1.5        | 0, 0.5         |                              | 677(-53); 896(-35); 1058(-63); 1281(-39); 1488(-28); 1649(-57)         |
| 2, 1.5        | 1, 0.5         |                              | 664(-57); 899(-22); 1079(-32); 1275(-34); 1426(-78); 1663(-31)         |
| 1, 0.5        | 0, -0.5        |                              | 1312(-16); 1684(-21); 2046(-15); 2422(-10); 2772(-22); 3149(3)         |
| 0, 0.5        | -1, -0.5       |                              | 1374(-37); 1746(-43); 2108(-37); 2484(-32); 2834(-46); 3211(-21)       |
| 0, -0.5       | -1, -1.5       |                              | 1903(-27); 2477(-5); 2976(-25); 3516(-26); 4025(-42); 4550(-26)        |
| -1, -0.5      | -2, -1.5       |                              | 1959(-14); 2512(-13); 3040(-5); 3553(-33); 4106(-7); 4602(-20)         |
| $^pQ_{12}(1)$ | $\parallel$    |                              |                                                                        |
| 2, 2.5        | 2, 2.5         | 878; 983                     | -251(-6); -308(-32)                                                    |
| 1, 1.5        | 1, 1.5         |                              | -251(-30); -308(-49)                                                   |
| 2, 1.5        | 2, 1.5         |                              | -168(4); -210(0)                                                       |
| 0, 0.5        | 0, 0.5         |                              | -168(-4); -210(-9)                                                     |
| 1, 0.5        | 1, 0.5         |                              | -168(-18); -210(-24)                                                   |
| 3, 2.5        | 3, 2.5         |                              | -224(-12); -267(-24)                                                   |
| -2, -2.5      | -2, -2.5       |                              | 73.3(-27); 91(-21)                                                     |
| -3, -2.5      | -3, -2.5       |                              | 132(-7); 122(-29)                                                      |
| $^pQ_{12}(1)$ | $\perp$        |                              |                                                                        |
| 1, 0.5        | 2, 1.5         | 982; 1095                    | -2646(-25); -2957(-32)                                                 |
| 0, 0.5        | 1, 1.5         |                              | -2646(-42); -2957(-39)                                                 |
| 1, 1.5        | 2, 2.5         |                              | -2577(-6); -2897(-11)                                                  |
| 2, 1.5        | 3, 2.5         |                              | -2577(-23); -2897(-38)                                                 |
| -1, -0.5      | 0, 0.5         |                              | -2577(-31); -2897(-36)                                                 |

Supplemental Table 2 (Cont.)

| $M'_F, M'_J$                     | $M''_F, M''_J$ | Field (Gauss) | Shift(MHz) <sup>a</sup> |
|----------------------------------|----------------|---------------|-------------------------|
| <sup>p</sup> Q <sub>12</sub> (1) | ⊥              |               |                         |
| 0, -0.5                          | 1, 0.5         |               | -2577(-29); -2897(-34)  |
| -1, -1.5                         | 0, -0.5        |               | -2500(-14); -2816(-25)  |
| -2, -1.5                         | -1, -0.5       |               | -2500(-52); -2816(-62)  |
| -2, -2.5                         | -1, -1.5       |               | -2439(-53); -2751(-78)  |
| -3, -2.5                         | -2, -1.5       |               | -2367(-56); -2667(-69)  |
| 2, 2.5                           | 1, 1.5         |               | 2057(-29); 2256(-57)    |
| 1, 1.5                           | 0, 0.5         |               | 2139(-5); 2348(-23)     |
| 2, 1.5                           | 1, 0.5         |               | 2139(-37); 2348(-55)    |
| 0, 0.5                           | -1, -0.5       |               | 2240(-2); 2459(-19)     |
| 1, 0.5                           | 0, -0.5        |               | 2240(2); 2459(-15)      |
| 0, -0.5                          | -1, -1.5       |               | 2370(33); 2590(-1)      |
| -1, -0.5                         | -2, -1.5       |               | 2370(-9); 2590(-43)     |
| -1, -1.5                         | -2, -2.5       |               | 2474(1); 2726(-29)      |
| -2, -1.5                         | -3, -2.5       |               | 2478(-18); 2758(-19)    |

<sup>a</sup> The numbers in parentheses is the observed minus calculated shifts.

<sup>b</sup> “||” = parallel polarization ; “⊥” = perpendicular polarization.
